# Supplementary material for: Innovative Strategy for MicroRNA Delivery in Human Mesenchymal Stem Cells via Magnetic Nanoparticles
Source: MDPI journal article supplement (doi:10.3390/ijms140610710), 2013-05-23
Supplement: s1 [file s1]

## Supplementary Information

**Figure S1.** Cytotoxicity of transfection complexes over time. (A) hMSCs were transfected with miR only, miR/PEI or miR/PEI/MNP complexes and cytotoxicity was determined by flow cytometry 5, 24 and 72 h after transfection. miR/PEI or miR/PEI/MNP complexes with 5 pmol/cm<sup>2</sup> miR at NP ratio 10 with 1 µg/mL MNPs were used. Untransfected cells were used as control, *n* = 1; (B,C) Gating strategy for LIVE/DEAD<sup>®</sup> staining; (B) Positive control. hMSCs were incubated for 20 min with 4% PFA and subsequently stained with Near-IR LIVE/DEAD<sup>®</sup> Fixable Dead Cell Stain Kit. Red indicates dead cell population. Black indicates live cell population; (C) Representative image after transfection with magnetic miR/PEI/MNP complexes 24 h after transfection.

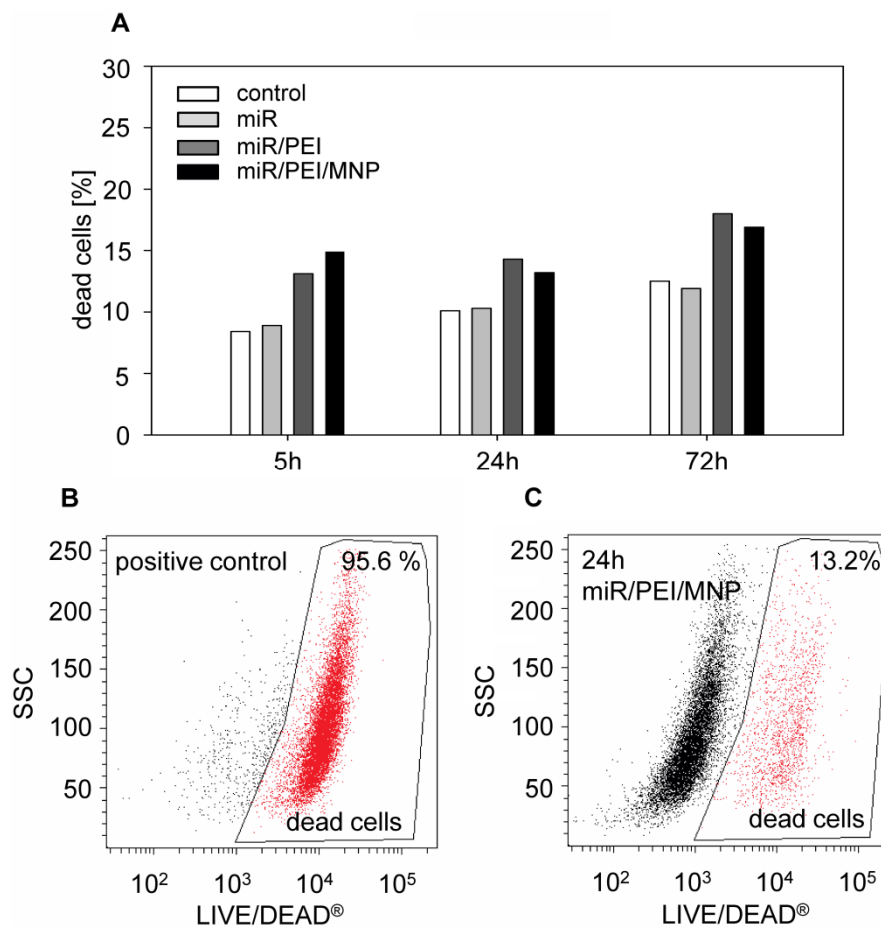

**Table S1.** Cycle threshold (Ct) values of mature miR-335 hMSCs were transfected with precursor-miR-335 using miR only, miR/PEI or miR/PEI/MNP complexes and level of a mature miR-335 strand was detected by real time PCR 5, 24 and 72 h after transfection. Values were normalized to RNU6B expression. Untransfected cells were used as a reference to calculate the relative expression ratio (*R*). The data are representative of 5 independent biological experiments (*n* = 5), each of which was measured in qPCR-triplicates.

| Timepoint | Sample        | No | Ct Mean |         | $\Delta$ Ct Mean | $\Delta\Delta$ Ct Mean | R                |
|-----------|---------------|----|---------|---------|------------------|------------------------|------------------|
|           |               |    | miR-335 | RNU6B   |                  |                        |                  |
| 5 h       | miR           | 1  | 28,9852 | 33,5727 | -4,5875          | -3,2098                | <b>9,2523</b>    |
|           |               | 2  | 29,6175 | 34,1744 | -4,5569          | -2,9131                | <b>7,5323</b>    |
|           |               | 3  | 26,5860 | 32,6303 | -6,0443          | -4,0247                | <b>16,2757</b>   |
|           |               | 4  | 31,3356 | 35,8184 | -4,4828          | -3,3282                | <b>10,0434</b>   |
|           |               | 5  | 28,5902 | 34,1744 | -5,5842          | -3,2852                | <b>9,7484</b>    |
|           | miR/PEI       | 1  | 23,8323 | 32,7630 | -8,9307          | -7,5530                | <b>187,7923</b>  |
|           |               | 2  | 22,6175 | 32,0630 | -9,4455          | -7,8017                | <b>223,1276</b>  |
|           |               | 3  | 21,8911 | 31,7946 | -9,9035          | -7,8838                | <b>236,1854</b>  |
|           |               | 4  | 24,1152 | 33,2235 | -9,1084          | -7,9538                | <b>247,9256</b>  |
|           |               | 5  | 22,1075 | 32,1632 | -10,0557         | -7,7567                | <b>216,2721</b>  |
|           | miR/PEIMNP    | 1  | 23,7668 | 32,3371 | -8,5703          | -7,1926                | <b>146,2780</b>  |
|           |               | 2  | 22,3919 | 32,2204 | -9,8285          | -8,1847                | <b>290,9662</b>  |
|           |               | 3  | 21,7014 | 31,9340 | -10,2326         | -8,2129                | <b>296,7171</b>  |
|           |               | 4  | 21,7611 | 30,6993 | -8,9382          | -7,7836                | <b>220,3406</b>  |
|           |               | 5  | 22,1935 | 32,2204 | -10,0269         | -7,7279                | <b>211,9950</b>  |
|           | untransfected | 1  | 33,5814 | 34,9590 | -1,3777          |                        |                  |
|           |               | 2  | 32,6198 | 34,2636 | -1,6438          |                        |                  |
|           |               | 3  | 30,9557 | 32,9753 | -2,0197          |                        |                  |
|           |               | 4  | 31,8105 | 32,9650 | -1,1546          |                        |                  |
|           |               | 5  | 31,9646 | 34,2636 | -2,2990          |                        |                  |
| 24 h      | miR           | 1  | 29,7904 | 35,9402 | -6,1498          | -1,6268                | <b>3,0882</b>    |
|           |               | 2  | 27,7001 | 32,7212 | -5,0212          | -2,3906                | <b>5,2436</b>    |
|           |               | 3  | 28,0608 | 32,3681 | -4,3073          | -1,2965                | <b>2,4564</b>    |
|           |               | 4  | 27,8005 | 32,3402 | -4,5397          | -1,4775                | <b>2,7847</b>    |
|           |               | 5  | 28,0007 | 32,7212 | -4,7205          | -1,4356                | <b>2,7049</b>    |
|           | miR/PEI       | 1  | 16,6253 | 31,2990 | -14,6737         | -10,1506               | <b>1136,6977</b> |
|           |               | 2  | 17,5141 | 30,9345 | -13,4204         | -10,7898               | <b>1770,3299</b> |
|           |               | 3  | 18,1011 | 31,3014 | -13,2003         | -10,1896               | <b>1167,7882</b> |
|           |               | 4  | 21,9596 | 36,3471 | -14,3875         | -11,3253               | <b>2565,9884</b> |
|           |               | 5  | 16,7514 | 30,9345 | -14,1831         | -10,8982               | <b>1908,4791</b> |
|           | miR/PEIMNP    | 1  | 15,0983 | 30,2430 | -15,1447         | -10,6217               | <b>1575,5732</b> |
|           |               | 2  | 18,0464 | 31,1964 | -13,1500         | -10,5194               | <b>1467,7814</b> |
|           |               | 3  | 18,7202 | 31,8987 | -13,1785         | -10,1677               | <b>1150,2566</b> |
|           |               | 4  | 21,9627 | 37,1464 | -15,1837         | -12,1215               | <b>4455,8879</b> |
|           |               | 5  | 16,9085 | 31,1964 | -14,2879         | -11,0030               | <b>2052,3159</b> |
|           | untransfected | 1  | 27,2145 | 31,7376 | -4,5231          |                        |                  |
|           |               | 2  | 29,9215 | 32,5521 | -2,6306          |                        |                  |
|           |               | 3  | 29,0101 | 32,0208 | -3,0108          |                        |                  |
|           |               | 4  | 27,0642 | 30,1264 | -3,0622          |                        |                  |
|           |               | 5  | 29,2672 | 32,5521 | -3,2849          |                        |                  |

Table S1. Cont.

| Timepoint | Sample        | No | Ct Mean |         | $\Delta$ Ct Mean | $\Delta\Delta$ Ct Mean | R                |
|-----------|---------------|----|---------|---------|------------------|------------------------|------------------|
|           |               |    | miR-335 | RNU6B   |                  |                        |                  |
| 72 h      | miR           | 1  | 29,6888 | 32,1914 | −2,5026          | −0,0174                | <b>1,0121</b>    |
|           |               | 2  | 27,1232 | 30,9602 | −3,8370          | −1,4472                | <b>2,7267</b>    |
|           |               | 3  | 28,9918 | 31,4741 | −2,4822          | −0,7210                | <b>1,6483</b>    |
|           |               | 4  | 31,5005 | 34,7863 | −3,2858          | −0,7389                | <b>1,6689</b>    |
|           |               | 5  | 28,1681 | 31,2549 | −3,0868          | −0,2886                | <b>1,2214</b>    |
|           | miR/PEI       | 1  | 20,6292 | 32,7292 | −12,1000         | −9,6148                | <b>784,0311</b>  |
|           |               | 2  | 21,4123 | 32,9245 | −11,5122         | −9,1224                | <b>557,3231</b>  |
|           |               | 3  | 21,7118 | 32,2124 | −10,5006         | −8,7393                | <b>427,3613</b>  |
|           |               | 4  | 18,7821 | 30,3560 | −11,5739         | −9,0270                | <b>521,6752</b>  |
|           |               | 5  | 20,9429 | 32,5443 | −11,6014         | −8,8031                | <b>446,6960</b>  |
|           | miR/PEIMNP    | 1  | 20,2035 | 33,2752 | −13,0717         | −10,5865               | <b>1537,6868</b> |
|           |               | 2  | 17,9000 | 30,9356 | −13,0355         | −10,6457               | <b>1602,0423</b> |
|           |               | 3  | 18,6565 | 31,2571 | −12,6006         | −10,8394               | <b>1832,1868</b> |
|           |               | 4  | 18,0018 | 31,2101 | −13,2082         | −10,6613               | <b>1619,4590</b> |
|           |               | 5  | 18,8843 | 32,5848 | −13,7005         | −10,9022               | <b>1913,8324</b> |
|           | untransfected | 1  | 30,1571 | 32,6423 | −2,4852          |                        |                  |
|           |               | 2  | 30,1950 | 32,5848 | −2,3898          |                        |                  |
|           |               | 3  | 29,9509 | 31,7121 | −1,7613          |                        |                  |
|           |               | 4  | 29,8123 | 32,3593 | −2,5469          |                        |                  |
|           |               | 5  | 28,4118 | 31,2101 | −2,7982          |                        |                  |

**Table S2.** Cycle threshold (Ct) values of TNC hMSCs were transfected with miR only, miR/PEI or miR/PEI/MNP complexes and relative gene expression of TNC was measured by real-time PCR 5, 24 and 72 h after transfection. Values were normalized to GAPDH gene expression. Untransfected cells were used as a reference to calculate the relative expression ratio (*R*). The data are representative of 5 independent biological experiments (*n* = 5), each of which was measured in qPCR-triplicates.

| Timepoint | Sample        | No | Ct Mean |         | $\Delta C_t$<br>Mean | $\Delta\Delta C_t$<br>Mean | R             |
|-----------|---------------|----|---------|---------|----------------------|----------------------------|---------------|
|           |               |    | TNC     | GAPDH   |                      |                            |               |
| 5 h       | miR           | 1  | 23,4147 | 20,9970 | 2,4178               | −0,1952                    | <b>1,1449</b> |
|           |               | 2  | 22,2976 | 23,3384 | −1,0407              | −0,0232                    | <b>1,0162</b> |
|           |               | 3  | 21,1047 | 23,3411 | −2,2364              | −0,1202                    | <b>1,0869</b> |
|           |               | 4  | 24,3736 | 24,0232 | 0,3505               | −0,2152                    | <b>1,1609</b> |
|           |               | 5  | 24,2939 | 23,1906 | 1,1033               | 0,0627                     | <b>0,9575</b> |
|           | miR/PEI       | 1  | 23,4992 | 20,6985 | 2,8007               | 0,1877                     | <b>0,8780</b> |
|           |               | 2  | 23,3799 | 24,2263 | −0,8464              | 0,1711                     | <b>0,8882</b> |
|           |               | 3  | 22,1691 | 23,8650 | −1,6959              | 0,4203                     | <b>0,7473</b> |
|           |               | 4  | 24,5940 | 24,0233 | 0,5707               | 0,0050                     | <b>0,9966</b> |
|           |               | 5  | 25,0963 | 23,9497 | 1,1466               | 0,1059                     | <b>0,9292</b> |
|           | miR/PEIMNP    | 1  | 27,7902 | 24,6983 | 3,0918               | 0,4788                     | <b>0,7176</b> |
|           |               | 2  | 22,1571 | 22,9641 | −0,8070              | 0,2105                     | <b>0,8642</b> |
|           |               | 3  | 21,2687 | 22,9580 | −1,6892              | 0,4269                     | <b>0,7438</b> |
|           |               | 4  | 23,5946 | 23,0465 | 0,5480               | −0,0177                    | <b>1,0123</b> |
|           |               | 5  | 26,1930 | 24,9753 | 1,2177               | 0,1770                     | <b>0,8845</b> |
|           | untransfected | 1  | 24,4286 | 21,8156 | 2,6130               |                            |               |
|           |               | 2  | 22,8603 | 23,8778 | −1,0175              |                            |               |
|           |               | 3  | 21,8675 | 23,9837 | −2,1162              |                            |               |
|           |               | 4  | 24,8210 | 24,2553 | 0,5657               |                            |               |
|           |               | 5  | 23,6960 | 22,6553 | 1,0406               |                            |               |
| 24 h      | miR           | 1  | 24,4887 | 23,5675 | 0,9211               | 0,1105                     | <b>0,9263</b> |
|           |               | 2  | 21,3965 | 19,6164 | 1,7801               | 0,1671                     | <b>0,8906</b> |
|           |               | 3  | 21,5093 | 19,6234 | 1,8859               | 0,1933                     | <b>0,8746</b> |
|           |               | 4  | 21,4170 | 19,5174 | 1,8996               | 0,1363                     | <b>0,9098</b> |
|           |               | 5  | 21,1952 | 19,7084 | 1,4868               | 0,1036                     | <b>0,9307</b> |
|           | miR/PEI       | 1  | 25,2994 | 24,0382 | 1,2612               | 0,4506                     | <b>0,7318</b> |
|           |               | 2  | 24,7899 | 22,5643 | 2,2256               | 0,6126                     | <b>0,6540</b> |
|           |               | 3  | 24,0156 | 21,1066 | 2,9090               | 1,2164                     | <b>0,4304</b> |
|           |               | 4  | 23,8341 | 21,6489 | 2,1852               | 0,4220                     | <b>0,7464</b> |
|           |               | 5  | 22,7903 | 20,9375 | 1,8528               | 0,4696                     | <b>0,7221</b> |
|           | miR/PEIMNP    | 1  | 24,8506 | 22,9895 | 1,8611               | 1,0504                     | <b>0,4828</b> |
|           |               | 2  | 27,7221 | 24,8993 | 2,8228               | 1,2098                     | <b>0,4323</b> |
|           |               | 3  | 26,8557 | 24,6042 | 2,2515               | 0,5589                     | <b>0,6788</b> |
|           |               | 4  | 26,7716 | 24,5556 | 2,2160               | 0,4528                     | <b>0,7306</b> |
|           |               | 5  | 26,8300 | 24,9351 | 1,8949               | 0,5117                     | <b>0,7014</b> |
|           | untransfected | 1  | 24,8496 | 24,0389 | 0,8107               |                            |               |
|           |               | 2  | 20,4286 | 18,8156 | 1,6130               |                            |               |
|           |               | 3  | 20,3793 | 18,6867 | 1,6926               |                            |               |
|           |               | 4  | 20,4057 | 18,6424 | 1,7632               |                            |               |
|           |               | 5  | 20,5008 | 19,1176 | 1,3832               |                            |               |

Table S2. Cont.

| Timepoint | Sample        | No | Ct Mean |         | $\Delta C_t$<br>Mean | $\Delta\Delta C_t$<br>Mean | R             |
|-----------|---------------|----|---------|---------|----------------------|----------------------------|---------------|
|           |               |    | TNC     | GAPDH   |                      |                            |               |
| 72 h      | miR           | 1  | 24,0965 | 23,4980 | 0,5985               | 0,0857                     | <b>0,9424</b> |
|           |               | 2  | 24,9529 | 22,4269 | 2,5260               | −0,0714                    | <b>1,0507</b> |
|           |               | 3  | 22,7903 | 22,4082 | 0,3821               | −0,3114                    | <b>1,2409</b> |
|           |               | 4  | 22,7776 | 22,4305 | 0,3471               | 0,0550                     | <b>0,9626</b> |
|           |               | 5  | 20,9647 | 23,3573 | −2,3926              | −0,0580                    | <b>1,0410</b> |
|           | miR/PEI       | 1  | 27,4484 | 26,3584 | 1,0900               | 0,5772                     | <b>0,6703</b> |
|           |               | 2  | 23,8260 | 20,6985 | 3,1275               | 0,5301                     | <b>0,6925</b> |
|           |               | 3  | 27,5431 | 25,9710 | 1,5721               | 0,8786                     | <b>0,5439</b> |
|           |               | 4  | 27,7921 | 26,7329 | 1,0592               | 0,7672                     | <b>0,5876</b> |
|           |               | 5  | 24,8112 | 26,3712 | −1,5600              | 0,7746                     | <b>0,5845</b> |
|           | miR/PEIMNP    | 1  | 24,2940 | 22,6432 | 1,6507               | 1,1379                     | <b>0,4544</b> |
|           |               | 2  | 28,5914 | 24,6983 | 3,8931               | 1,2958                     | <b>0,4073</b> |
|           |               | 3  | 26,7429 | 25,1812 | 1,5617               | 0,8682                     | <b>0,5478</b> |
|           |               | 4  | 26,3920 | 24,3844 | 2,0077               | 1,7156                     | <b>0,3045</b> |
|           |               | 5  | 24,4875 | 25,1323 | −0,6448              | 1,6898                     | <b>0,3100</b> |
|           | untransfected | 1  | 23,2498 | 22,7370 | 0,5129               |                            |               |
|           |               | 2  | 25,3343 | 22,7370 | 2,5974               |                            |               |
|           |               | 3  | 23,4019 | 22,7085 | 0,6935               |                            |               |
|           |               | 4  | 22,9903 | 22,6983 | 0,2920               |                            |               |
|           |               | 5  | 20,4696 | 22,8042 | −2,3346              |                            |               |

**Table S3.** Cycle threshold (C<sub>T</sub>) values of RUNX2 hMSCs were transfected with miR only, miR/PEI or miR/PEI/MNP complexes and relative gene expression of RUNX2 was measured by real-time PCR 5, 24 and 72 h after transfection. Values were normalized to GAPDH gene expression. Untransfected cells were used as a reference to calculate the relative expression ratio (*R*). The data are representative of 5 independent biological experiments (*n* = 5), each of which was measured in qPCR-triplicates.

| Timepoint | Sample        | No | C <sub>T</sub> Mean |         | $\Delta$ C <sub>T</sub> Mean | $\Delta\Delta$ C <sub>T</sub> Mean | R             |
|-----------|---------------|----|---------------------|---------|------------------------------|------------------------------------|---------------|
|           |               |    | RUNX2               | GAPDH   |                              |                                    |               |
| 5 h       | miR           | 1  | 23,6412             | 20,9970 | 2,6442                       | 0,0312                             | <b>0,9786</b> |
|           |               | 2  | 22,6052             | 23,3384 | −0,7332                      | 0,2844                             | <b>0,8211</b> |
|           |               | 3  | 21,1672             | 23,3411 | −2,1739                      | −0,0577                            | <b>1,0408</b> |
|           |               | 4  | 24,5839             | 24,0232 | 0,5607                       | −0,0050                            | <b>1,0035</b> |
|           |               | 5  | 24,1584             | 23,1906 | 0,9678                       | −0,0729                            | <b>1,0518</b> |
|           | miR/PEI       | 1  | 23,5074             | 20,6985 | 2,8089                       | 0,1959                             | <b>0,8731</b> |
|           |               | 2  | 24,7829             | 24,2263 | 0,5566                       | 1,5741                             | <b>0,3358</b> |
|           |               | 3  | 21,8043             | 23,8650 | −2,0607                      | 0,0555                             | <b>0,9623</b> |
|           |               | 4  | 24,5996             | 24,0233 | 0,5763                       | 0,0106                             | <b>0,9927</b> |
|           |               | 5  | 25,5996             | 23,9497 | 1,6499                       | 0,6092                             | <b>0,6555</b> |
|           | miR/PEIMNP    | 1  | 27,1781             | 24,6983 | 2,4797                       | −0,1333                            | <b>1,0968</b> |
|           |               | 2  | 22,8806             | 22,9641 | −0,0835                      | 0,9340                             | <b>0,5234</b> |
|           |               | 3  | 20,8393             | 22,9580 | −2,1187                      | −0,0025                            | <b>1,0018</b> |
|           |               | 4  | 23,5806             | 23,0465 | 0,5340                       | −0,0317                            | <b>1,0222</b> |
|           |               | 5  | 26,6099             | 24,9753 | 1,6346                       | 0,5939                             | <b>0,6625</b> |
|           | untransfected | 1  | 24,4286             | 21,8156 | 2,6130                       |                                    |               |
|           |               | 2  | 22,8603             | 23,8778 | −1,0175                      |                                    |               |
|           |               | 3  | 21,8675             | 23,9837 | −2,1162                      |                                    |               |
|           |               | 4  | 24,8210             | 24,2553 | 0,5657                       |                                    |               |
|           |               | 5  | 23,6960             | 22,6553 | 1,0406                       |                                    |               |
| 24 h      | miR           | 1  | 24,6099             | 23,5675 | 1,0423                       | 0,2317                             | <b>0,8517</b> |
|           |               | 2  | 21,5563             | 19,6164 | 1,9399                       | 0,3268                             | <b>0,7973</b> |
|           |               | 3  | 21,5209             | 19,6234 | 1,8975                       | 0,2049                             | <b>0,8676</b> |
|           |               | 4  | 21,6143             | 19,5174 | 2,0969                       | 0,3337                             | <b>0,7935</b> |
|           |               | 5  | 21,3955             | 19,7084 | 1,6871                       | 0,3040                             | <b>0,8100</b> |
|           | miR/PEI       | 1  | 25,6428             | 24,0382 | 1,6045                       | 0,7939                             | <b>0,5768</b> |
|           |               | 2  | 26,0845             | 22,5643 | 3,5202                       | 1,9071                             | <b>0,2666</b> |
|           |               | 3  | 23,3879             | 21,1066 | 2,2812                       | 0,5886                             | <b>0,6650</b> |
|           |               | 4  | 23,9918             | 21,6489 | 2,3430                       | 0,5797                             | <b>0,6691</b> |
|           |               | 5  | 22,8356             | 20,9375 | 1,8981                       | 0,5149                             | <b>0,6998</b> |
|           | miR/PEIMNP    | 1  | 24,5071             | 22,9895 | 1,5175                       | 0,7069                             | <b>0,6126</b> |
|           |               | 2  | 27,8943             | 24,8993 | 2,9950                       | 1,3820                             | <b>0,3837</b> |
|           |               | 3  | 26,9964             | 24,6042 | 2,3922                       | 0,6996                             | <b>0,6158</b> |
|           |               | 4  | 27,0944             | 24,5556 | 2,5388                       | 0,7756                             | <b>0,5842</b> |
|           |               | 5  | 26,6528             | 24,9351 | 1,7177                       | 0,3345                             | <b>0,7930</b> |
|           | untransfected | 1  | 24,8496             | 24,0389 | 0,8107                       |                                    |               |
|           |               | 2  | 20,4286             | 18,8156 | 1,6130                       |                                    |               |
|           |               | 3  | 20,3793             | 18,6867 | 1,6926                       |                                    |               |
|           |               | 4  | 20,4057             | 18,6424 | 1,7632                       |                                    |               |
|           |               | 5  | 20,5008             | 19,1176 | 1,3832                       |                                    |               |

Table S3. Cont.

| Timepoint | Sample        | No | Ct Mean |         | $\Delta C_t$<br>Mean | $\Delta\Delta C_t$<br>Mean | R             |
|-----------|---------------|----|---------|---------|----------------------|----------------------------|---------------|
|           |               |    | RUNX2   | GAPDH   |                      |                            |               |
| 72 h      | miR           | 1  | 23,9932 | 23,4980 | 0,4953               | −0,0176                    | <b>1,0123</b> |
|           |               | 2  | 25,0249 | 22,4269 | 2,5981               | 0,0007                     | <b>0,9995</b> |
|           |               | 3  | 23,1068 | 22,4082 | 0,6985               | 0,0051                     | <b>0,9965</b> |
|           |               | 4  | 22,7578 | 22,4305 | 0,3273               | 0,0353                     | <b>0,9759</b> |
|           |               | 5  | 20,9498 | 23,3573 | −2,4075              | −0,0729                    | <b>1,0519</b> |
|           | miR/PEI       | 1  | 27,5602 | 26,3584 | 1,2018               | 0,6890                     | <b>0,6203</b> |
|           |               | 2  | 23,8707 | 20,6985 | 3,1722               | 0,5749                     | <b>0,6714</b> |
|           |               | 3  | 27,0167 | 25,9710 | 1,0456               | 0,3521                     | <b>0,7834</b> |
|           |               | 4  | 27,5187 | 26,7329 | 0,7858               | 0,4938                     | <b>0,7102</b> |
|           |               | 5  | 24,6379 | 26,3712 | −1,7333              | 0,6013                     | <b>0,6592</b> |
|           | miR/PEIMNP    | 1  | 23,8368 | 22,6432 | 1,1935               | 0,6807                     | <b>0,6239</b> |
|           |               | 2  | 28,6613 | 24,6983 | 3,9630               | 1,3656                     | <b>0,3881</b> |
|           |               | 3  | 26,9712 | 25,1812 | 1,7900               | 1,0965                     | <b>0,4676</b> |
|           |               | 4  | 25,4589 | 24,3844 | 1,0746               | 0,7825                     | <b>0,5813</b> |
|           |               | 5  | 23,7188 | 25,1323 | −1,4134              | 0,9211                     | <b>0,5281</b> |
|           | untransfected | 1  | 23,2498 | 22,7370 | 0,5129               |                            |               |
|           |               | 2  | 25,3343 | 22,7370 | 2,5974               |                            |               |
|           |               | 3  | 23,4019 | 22,7085 | 0,6935               |                            |               |
|           |               | 4  | 22,9903 | 22,6983 | 0,2920               |                            |               |
|           |               | 5  | 20,4696 | 22,8042 | −2,3346              |                            |               |

© 2013 by the authors; licensee MDPI, Basel, Switzerland. This article is an open access article distributed under the terms and conditions of the Creative Commons Attribution license (<http://creativecommons.org/licenses/by/3.0/>).
